# Supplementary material
Source: publisher site journal article supplement (http://www.spandidos-publications.com/4190/downloadSupplementary)
Supplement: Supplementary file 1 [file downloadSupplementary]

Video SI. Intravital imaging of neutrophil recruitment into the livers of wild-type mice for 15 min, after 6-h treatment with PBS. Neutrophils were stained using rhodamine-conjugated anti-Ly-6G antibody.

Video SII. Intravital imaging of neutrophil recruitment into the livers of wild-type mice for 15 min, after 6-h treatment with FTY720 (5 mg/kg). Neutrophils were stained using rhodamine-conjugated anti-Ly-6G antibody.

Video SIII. Intravital imaging of neutrophil recruitment into the livers of wild-type mice for 15 min, after 6-h treatment with APAP (300 mg/kg). Neutrophils were stained using rhodamine-conjugated anti-Ly-6G antibody. APAP, acetaminophen.

Video SIV. Intravital imaging of neutrophil recruitment into the livers of wild-type mice for 15 min, after 6-h treatment with APAP (300 mg/kg) + FTY720 (5 mg/kg). Neutrophils were stained using rhodamine-conjugated anti-Ly-6G antibody. APAP, acetaminophen.
